# Supplementary material for: Attempted Suicide: Lived Experiences of Refugees in Rhino Camp, West Nile Uganda
Source: Research Square preprint supplement (doi:10.21203/rs.3.rs-8228150/v1), 2025-12-26
Supplement: Supplementary file 1 [file 0b8e40d8d995ccb795c03e71.docx]

**Supplementary File (Interview guides)**

**Interview Guide for Participants who attempted Suicide:**

**PART A:** Respondent Characteristics

1. Sex

Female Male

2. Age ……………………………………..

3. Marital status

4. Married
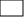
 Single Divorced

Separated Widow/Widower

5. What is your highest level of academic qualification

Degree Diploma

Certificate Other………………………………

**PART B:** Interview Guide for Participants who attempted Suicide:

**OBJECTIVE 1: Triggers** **of suicide attempt among refugees**

1. What led you into attempting suicide?
2. Are there people in your family that have attempted or completed suicide?
3. As an individual have you experience any traumatic/life threatening events (war, rape, childhood torture, GBV etc). how did this contribute to you suicide attempt?
4. Did you experience any form of mental health problem before suicide attempt (depression, PTSD and anxiety)?
5. Do you use any form of substance like alcohol, marajuna, cuba, cigarette, mira/maruji, shisha. If yes, what happened when you don’t use it (lack of sleep, handshaking, stomach pain, loss of appetite)?
6. Do you have any social and financial constraints (lack of basic needs, unemployment, stigma, sense of love and belonging, lack of social support and hopelessness). If yes, how has it contributed to your suicide attempt?
7. Are you struggling with any chronic illness or pain (physical disability, diabetes, HIV/AIDS, and cancer). If yes, how has it influence your thoughts to attempt suicide?
8. By the time of your suicide attempt did you had any relationship problem. If yes, how did it contribute to your suicide attempt?

**OBJECTIVE 2**: **Subjective experience of refugee’s suicide attempt survivors**

1. When you attempted suicide was it your first time? If no, how many times have you attempted suicide and when was your last attempt?
2. What do you remember about the incident that led you to attempt suicide (thoughts, emotions and intent)? How did you feel? What was your state of mind?
3. Can you tell me your experience after attempting suicide (seriousness of the injury, thoughts and emotions, stigma)? After your attempt, when you realize what happened, how do you feel?
4. What method did you use at the time of attempt, did you had one method in plan or you had others and why did you choose that method?
5. When you made that decision to suicide attempt, what did you think would happen? What did you think people would understand? Can you tell me more about that? How did you feel? Can you recall a particular example of that?
6. What kind of changes there were in your life? In your family? Between your friends? How do you react to these changes? What has it changed for you today?

**OBJECTIVE 3: Available support systems for refugees who attempted suicide**

1. Did you get help after attempting suicide. If yes, did you seek help a lone, or did someone get help for you?
2. What kind of support did you get after attempting suicide?
3. Did you receive any support from the following people (Police, RWC leaders, Psychiatry, psychologist, OPM). If yes, how did they help you?
4. How did you cope after the suicide attempt?
5. Do you have any suggestion on how people who attempted suicide can be helped in future?

# **Appendix 2: In-depth Interview Guide for the Key- Informants**

| **Title: ATTEMPTED SUICIDE: LIVED EXPERIENCES OF REFUGEES IN RHINO CAMP, WESTNILE UGANDA** | | |
| --- | --- | --- |
| No | Informant’s name (Optional) |  |
|  | Age |  |
|  | Occupation |  |
|  | Marital status |  |
|  | Household head |  |
|  | Number of family members |  |
|  | Years of work with refugees |  |

1. From suicide attempts cases you have handled/registered since the time you have worked with refugees, what do you think are the triggers of suicide attempts in Rhino Camp?
2. What has been your personal experiences in handling suicide survivors (emotional, thoughts)? How do you handle such cases when it arose in the camp?
3. What support systems exist to handle refugee suicide survivors? If yes, what kind of services do they offer?
4. In your own opinion, do you have any suggestion on how suicides cases can be reduced within the camp?
